# Supplementary material
Source: PubMed Central journal article supplement (PMC5539968)
Supplement: NIHMS872480-supplement-Supplemental_Material__Preeclampsia_and_the_Risk_of_Stroke.pdf [file NIHMS872480-supplement-Supplemental_Material__Preeclampsia_and_the_Risk_of_Stroke.pdf]

## SUPPLEMENTAL MATERIAL

### **Risk Factors for Pregnancy-Associated Stroke in Women with Preeclampsia: a Case-Control Study**

Eliza C. Miller MD (1), Hajere J. Gatollari MPH (2), Gloria Too MD (3), Amelia K. Boehme PhD, MSPH (1,2), Lisa Leffert MD (4), Randolph S. Marshall, M.D. (1), Mitchell S.V. Elkind MD, MS (1,2), Joshua Z. Willey MD, MS (1)

*Organization: 1. Department of Neurology, College of Physicians and Surgeons, Columbia University, New York, NY, United States 2. Department of Epidemiology, Mailman School of Public Health, Columbia University, New York, NY, United States 3. Department of Obstetrics and Gynecology, Columbia University, New York, NY, United States 4. Department of Anesthesia, Critical Care & Pain Medicine, Massachusetts General Hospital, Boston, MA, United States*

#### Table of Contents

|                                                                                                     |    |
|-----------------------------------------------------------------------------------------------------|----|
| Supplemental Table I. Pregnancy-specific stroke ICD-9 code validation .....                         | 2  |
| Supplemental Table II. ICD-9 Codes used in identifying patients and patient characteristics.....    | 4  |
| Supplemental Table III. Discharge disposition in women with PEC, with and without PAS.....          | 10 |
| Supplemental Table IV. Subgroup analysis, stratified by severity.....                               | 11 |
| Supplemental Table V: Demographics and risk factors: Comparing mild vs severe cases and controls... | 12 |
| Supplemental Table VI: Sensitivity analysis: Stroke risk factors, excluding eclampsia.....          | 14 |
| Supplemental Table VII. Subgroup analysis: Postpartum strokes only, univariable analysis.....       | 15 |
| Supplemental Table VIII: Postpartum strokes only, multivariable analysis .....                      | 16 |
| Supplemental Figure I. Stroke subtypes in women with preeclampsia and stroke.....                   | 17 |
| References.....                                                                                     | 18 |

## Supplemental Table I. Pregnancy-specific stroke ICD-9 code validation

**Background:** Pregnancy-specific stroke ICD-9 codes have been used in epidemiological studies to identify pregnancy-associated strokes (PAS),<sup>1-4</sup> but may have poor positive predictive value (PPV).<sup>5</sup> We previously validated the sensitivity of these codes at 92%,<sup>6</sup> based on an internal stroke registry. However, this registry includes only cases adjudicated as strokes by a panel of vascular neurologists, and is not based on administrative data.

**Methods:** We queried the electronic medical record system at Columbia University Medical Center for ICD-9 codes 671.5, 674.01, 674.02, 674.03, and 674.04 for any diagnosis from January 1, 2010 through December 31, 2015. IRB approval was obtained to review the individual medical records of the patients identified. PAS was defined as any confirmed cerebrovascular event, including TIA, ischemic stroke, SAH, ICH, cerebral venous thrombosis, or clinically and radiologically confirmed reversible cerebral vasoconstriction syndrome (with or without hemorrhage or infarct).

**Results:** A total of 56 individual patients were identified with codes 674.0x. There were no patients with the code 671.5. Of the 56 identified patients, 45 (80.4%) had confirmed PAS. The clinical diagnoses among the 11 false positives included: brain tumor (1), chronic hypertension (1), unruptured aneurysm (2), asymptomatic moyamoya disease (1), delivery admissions for women with prior non-pregnancy related ischemic or hemorrhagic stroke (4), complicated migraine(1), and remote gunshot wound to the head (1).

**Conclusions:** In our sample at a tertiary care center, pregnancy-specific stroke codes had a PPV of 80.4%.

| Case# | ICD-9 code (code position) | PAS (yes/no) | Timing             | Clinical diagnosis                       |
|-------|----------------------------|--------------|--------------------|------------------------------------------|
| 1     | 674.04 (5)                 | yes          | Postpartum         | Venous sinus thrombosis with ICH         |
| 2     | 674.04 (1)                 | yes          | Postpartum         | cardioembolic stroke                     |
| 3     | 674.04 (1)                 | yes          | Postpartum         | RCVS with SAH                            |
| 4     | 674.03 (1)                 | yes          | Antepartum         | cryptogenic stroke                       |
| 5     | 674.03 (1)                 | yes          | Antepartum         | cerebellar ICH                           |
| 6     | 674.04 (1)                 | yes          | Postpartum         | RCVS with SAH/ICH                        |
| 7     | 674.04 (5)                 | yes          | Postpartum         | RCVS with SAH                            |
| 8     | 674.03 (1)                 | yes          | Antepartum         | TIA                                      |
| 9     | 674.04 (1)                 | yes          | Postpartum         | RCVS                                     |
| 10    | 674.04 (1)                 | yes          | Postpartum         | RCVS                                     |
| 11    | 674.04 (5)                 | yes          | Postpartum         | SAH, possible RCVS                       |
| 12    | 674.04 (1)                 | yes          | Postpartum         | RCVS with SAH                            |
| 13    | 674.04 (1)                 | yes          | Postpartum         | RCVS with SAH                            |
| 14    | 674.01 (3)                 | no           | Delivery admission | Remote AVM bleed                         |
| 15    | 674.04 (1)                 | yes          | Postpartum         | Cortical vein thrombosis with SAH        |
| 16    | 674.03 (1)                 | no           | Antepartum         | Meningioma                               |
| 17    | 674.04 (1)                 | yes          | Postpartum         | Cortical vein thrombosis, venous infarct |
| 18    | 674.02 (8)                 | yes          | Postpartum         | ICH/SAH                                  |
| 19    | 674.04 (1)                 | yes          | Postpartum         | Basilar occlusion                        |
| 20    | 674.04 (1)                 | yes          | Postpartum         | ICA occlusion                            |
| 21    | 674.03 (1)                 | yes          | Antepartum         | AVM rupture, ICH                         |
| 22    | 674.03 (5)                 | yes          | Antepartum         | R MCA cryptogenic stroke                 |
| 23    | 674.03 (1)                 | yes          | Antepartum         | AVM rupture, ICH                         |
| 24    | 674.04 (1)                 | yes          | Antepartum         | AVM rupture, ICH                         |
| 25    | 674.04 (1)                 | yes          | Postpartum         | RCVS with SAH                            |
| 26    | 674.01 (2)                 | no           | Delivery admission | Chronic hypertension                     |
| 27    | 674.04 (1)                 | yes          | Postpartum         | Cardioembolic stroke                     |

|    |            |     |                    |                                        |
|----|------------|-----|--------------------|----------------------------------------|
| 28 | 674.01 (2) | no  | Delivery admission | Remote ICH from cavernous malformation |
| 29 | 674.01 (1) | no  | Delivery admission | Remote aneurysmal SAH                  |
| 30 | 674.04 (1) | yes | Postpartum         | ICH                                    |
| 31 | 674.04 (1) | yes | Postpartum         | RCVS with ICH                          |
| 32 | 674.04 (1) | yes | Postpartum         | RCVS                                   |
| 33 | 674.01 (2) | yes | Postpartum         | Recurrent RCVS                         |
| 34 | 674.03 (1) | no  | Antepartum         | Unruptured aneurysm                    |
| 35 | 674.04 (1) | yes | Postpartum         | RCVS with TIA                          |
| 36 | 674.03 (1) | no  | Antepartum         | Complicated migraine                   |
| 37 | 674.02 (5) | yes | Postpartum         | RCVS with ICH                          |
| 38 | 674.01 (2) | yes | Antepartum         | AVM rupture, ICH                       |
| 39 | 674.01 (1) | yes | Antepartum         | Cryptogenic stroke                     |
| 40 | 674.02 (5) | yes | During delivery    | Cardioembolic stroke                   |
| 41 | 674.04 (1) | yes | Postpartum         | RCVS with SAH                          |
| 42 | 674.03 (1) | yes | Antepartum         | Cryptogenic strokes                    |
| 43 | 674.01 (8) | no  | Delivery admission | Known moyamoya                         |
| 44 | 674.02 (7) | yes | Postpartum         | RCVS with SAH                          |
| 45 | 674.01 (1) | no  | Delivery admission | Unruptured aneurysm                    |
| 46 | 674.01 (1) | no  | Delivery admission | Unruptured AVM                         |
| 47 | 674.03 (1) | yes | Antepartum         | RCVS                                   |
| 48 | 674.02 (5) | yes | Postpartum         | RCVS                                   |
| 49 | 674.01 (1) | yes | Antepartum         | AVM rupture, ICH                       |
| 50 | 674.01 (1) | yes | Postpartum         | TIA                                    |
| 51 | 674.04 (1) | yes | Postpartum         | RCVS with SAH                          |
| 52 | 674.03 (1) | yes | Antepartum         | AVM rupture, ICH                       |
| 53 | 674.03 (9) | no  | Postpartum         | Old gunshot wound, hemiparesis         |
| 54 | 674.04 (1) | yes | Postpartum         | ICH                                    |
| 55 | 674.01 (1) | yes | Antepartum         | Cardioembolic strokes                  |
| 56 | 674.03 (1) | yes | Antepartum         | Aneurysmal SAH                         |

**Supplemental Table II. ICD-9 Codes Used in Identifying Patients and Patient Characteristics**

| Patient characteristics                                           | CODES (ICD-9-CM, International Classification of Diseases, 9th Revision, Clinical Modification)                                                                                                                                                                   |
|-------------------------------------------------------------------|-------------------------------------------------------------------------------------------------------------------------------------------------------------------------------------------------------------------------------------------------------------------|
|                                                                   |                                                                                                                                                                                                                                                                   |
| <b>IDENTIFICATION OF DELIVERIES AND PREGNANCY CHARACTERISTICS</b> |                                                                                                                                                                                                                                                                   |
| Antepartum admission                                              | Admissions with pregnancy code (630-648) with no delivery code; <sup>7</sup> fifth digit of 3 in codes for pregnancy-related primary or secondary diagnosis; V22, V23, V28, or 792.3 for any listed diagnosis; antenatal DRG codes 378–384 <sup>8</sup>           |
| Delivery admission                                                | Admissions with delivery code (vaginal or cesarean delivery, see below) <sup>7</sup>                                                                                                                                                                              |
| Postpartum admission                                              | Admissions with postpartum code (660-677) with no delivery code OR APR/DRG 561; <sup>7</sup> fifth digit of 2 or 4 in pregnancy-related codes for primary or secondary diagnosis; code V24 for any listed diagnosis; or postpartum DRG codes 376–377 <sup>8</sup> |
| Postpartum stroke during delivery admission                       | Admissions with delivery code AND pregnancy-associated stroke code with suffix .x2 (fifth digit "2") <sup>9</sup>                                                                                                                                                 |
| Vaginal delivery                                                  | V27, 72.x, 73.x, 650–659, APR/DRG 541, 560 <sup>10</sup>                                                                                                                                                                                                          |
| Cesarean delivery                                                 | 74.0x-74.2x, 74.4, 74.9x, 669.70, 669.71, 762.1, 763.4 or APR/DRG 540 <sup>11</sup>                                                                                                                                                                               |
| Peripartum hemorrhage                                             | 666 <sup>4</sup>                                                                                                                                                                                                                                                  |
| Gestational hypertension                                          | 642.3x, 642.9x <sup>12</sup>                                                                                                                                                                                                                                      |
| Mild or unspecified preeclampsia <sup>a</sup>                     | 642.4x, 642.7x <sup>13</sup>                                                                                                                                                                                                                                      |
| Severe preeclampsia <sup>a</sup>                                  | 642.5x <sup>13</sup>                                                                                                                                                                                                                                              |
| Eclampsia <sup>a,b</sup>                                          | 642.6x <sup>13</sup>                                                                                                                                                                                                                                              |
| Multiple gestation                                                | V27.2-V27.8, 651.x <sup>11</sup>                                                                                                                                                                                                                                  |
| Proteinuria/nephrotic syndrome                                    | 791.0, 581.81 <sup>9</sup>                                                                                                                                                                                                                                        |
| Gestational diabetes                                              | 648.8x <sup>11</sup>                                                                                                                                                                                                                                              |
| Small for gestational age                                         | 656.5x <sup>10</sup>                                                                                                                                                                                                                                              |
| Assisted reproductive technology                                  | V23.85 <sup>9</sup>                                                                                                                                                                                                                                               |
| History of previous cesarean section                              | 654.2x <sup>12</sup>                                                                                                                                                                                                                                              |
| Primigravida                                                      | V22.0, V23.81, V23.83 <sup>9</sup>                                                                                                                                                                                                                                |
| Multigravida                                                      | V22.1, V23.82, V23.84 <sup>9</sup>                                                                                                                                                                                                                                |
| Grand multiparity (5 or more deliveries)                          | V23.3, 659.40, 659.41, 659.43 <sup>9</sup>                                                                                                                                                                                                                        |
| Stillbirth                                                        | 656.4x, V27.1, V27.3, V27.4, V27.6, V27.7 <sup>11</sup>                                                                                                                                                                                                           |

|                                                                                                                                                                                                                                                                                                                                                                                                                                               |                                                                                                                                                                                             |
|-----------------------------------------------------------------------------------------------------------------------------------------------------------------------------------------------------------------------------------------------------------------------------------------------------------------------------------------------------------------------------------------------------------------------------------------------|---------------------------------------------------------------------------------------------------------------------------------------------------------------------------------------------|
| <sup>a</sup> These codes were shown to have PPV of 94.5% when applied to inpatient hospitalizations <sup>13</sup>                                                                                                                                                                                                                                                                                                                             |                                                                                                                                                                                             |
| <sup>b</sup> For the severity-stratified analysis, “eclampsia” was included in the “severe” group due to a validation study showing that more than half of women given this code did not meet criteria for eclampsia; all the women in the validation study misclassified as “eclampsia” met criteria for “severe preeclampsia” as defined until the 2013 update by the American College of Obstetricians and Gynecologists. <sup>14,15</sup> |                                                                                                                                                                                             |
|                                                                                                                                                                                                                                                                                                                                                                                                                                               |                                                                                                                                                                                             |
| <b>VASCULAR RISK FACTORS</b>                                                                                                                                                                                                                                                                                                                                                                                                                  |                                                                                                                                                                                             |
| Sickle cell disease                                                                                                                                                                                                                                                                                                                                                                                                                           | 282.4x, 282.6x <sup>11,12</sup>                                                                                                                                                             |
| Systemic lupus erythematosus                                                                                                                                                                                                                                                                                                                                                                                                                  | 710.0x <sup>11,12</sup>                                                                                                                                                                     |
| Coagulopathy                                                                                                                                                                                                                                                                                                                                                                                                                                  | 286.0-286.9, 287.1, 287.3-287.5, 289.81-289.82 <sup>16</sup>                                                                                                                                |
| Hypercoagulable state                                                                                                                                                                                                                                                                                                                                                                                                                         | 289.81, 289.82, <sup>17</sup> 649.3x <sup>9</sup>                                                                                                                                           |
| DVT/PE (acute, chronic, or history of prior)                                                                                                                                                                                                                                                                                                                                                                                                  | 415.1x, 453.4x, 453.5x, 453.72, 453.74, 453.75, 453.76, 453.77, 453.82, 453.84, 453.85, 453.86, 453.87, 671.3x, 671.4x, 673.0x, 673.1x, 673.2x, 673.3x, 673.8x, V12.51, V12.55 <sup>9</sup> |
| Chronic renal disease                                                                                                                                                                                                                                                                                                                                                                                                                         | 581.x-583.x, 585.x, 587.x, 588.x, 646.2x <sup>11,12</sup>                                                                                                                                   |
| Active smoking                                                                                                                                                                                                                                                                                                                                                                                                                                | 305.1.x, 649.0x <sup>12</sup>                                                                                                                                                               |
| Preexisting hypertension                                                                                                                                                                                                                                                                                                                                                                                                                      | 401.x-405.x, 642.0x-642.2x, 642.7x <sup>11</sup>                                                                                                                                            |
| Diabetes mellitus (excluding gestational diabetes)                                                                                                                                                                                                                                                                                                                                                                                            | 250.x, 648.0x <sup>11,12</sup>                                                                                                                                                              |
| Obesity                                                                                                                                                                                                                                                                                                                                                                                                                                       | 278.0x, 649.1x, V85.3, V85.4 <sup>12</sup>                                                                                                                                                  |
| Migraine                                                                                                                                                                                                                                                                                                                                                                                                                                      | 346.x <sup>7</sup>                                                                                                                                                                          |
| Malignancy                                                                                                                                                                                                                                                                                                                                                                                                                                    | 140.x-208.x <sup>11</sup>                                                                                                                                                                   |
| Pulmonary hypertension                                                                                                                                                                                                                                                                                                                                                                                                                        | 416.0, 416.8, 416.9 <sup>11,12</sup>                                                                                                                                                        |
| Chronic ischemic heart disease                                                                                                                                                                                                                                                                                                                                                                                                                | 412.x-414.x <sup>11,12</sup>                                                                                                                                                                |
| Congenital heart disease                                                                                                                                                                                                                                                                                                                                                                                                                      | 745.0x-747.4x, 648.5x <sup>11,12</sup>                                                                                                                                                      |
| Valvular heart disease                                                                                                                                                                                                                                                                                                                                                                                                                        | 394.x-397.x, 424.x <sup>11,12</sup>                                                                                                                                                         |
| Congestive heart failure                                                                                                                                                                                                                                                                                                                                                                                                                      | 428.22, 428.23, 428.32, 428.33, 428.42, 428.43 <sup>12</sup>                                                                                                                                |
| Drug abuse or dependence                                                                                                                                                                                                                                                                                                                                                                                                                      | 304.x-305.0x, 305.2x-305.9x, 648.3x <sup>11,12</sup>                                                                                                                                        |
| Alcohol abuse                                                                                                                                                                                                                                                                                                                                                                                                                                 | 291.xx, 303.xx, 305.0x <sup>12</sup>                                                                                                                                                        |
|                                                                                                                                                                                                                                                                                                                                                                                                                                               |                                                                                                                                                                                             |
| <b>INFECTIONS<sup>9</sup></b>                                                                                                                                                                                                                                                                                                                                                                                                                 |                                                                                                                                                                                             |
| <i>Pregnancy-related (includes the following):</i>                                                                                                                                                                                                                                                                                                                                                                                            |                                                                                                                                                                                             |
| Postpartum infection                                                                                                                                                                                                                                                                                                                                                                                                                          | 670x, 672x <sup>4</sup>                                                                                                                                                                     |
| Chorioamnionitis                                                                                                                                                                                                                                                                                                                                                                                                                              | 658.4x <sup>11</sup>                                                                                                                                                                        |
| Infectious and parasitic conditions in the mother classifiable elsewhere but complicating pregnancy childbirth or the puerperium                                                                                                                                                                                                                                                                                                              | 647.xx                                                                                                                                                                                      |

|                                                                     |                                      |
|---------------------------------------------------------------------|--------------------------------------|
| Mastitis                                                            | 675.xx                               |
| Puerperial infections                                               | 670.0x, .1x, .8x                     |
|                                                                     |                                      |
| <i>Sexually transmitted (includes the following):</i>               |                                      |
| HIV                                                                 | HIV-specific flag in SPARCS database |
| Syphilis                                                            | 647.0x                               |
| Gonorrhea                                                           | 647.1x                               |
| Other venereal                                                      | 647.2x                               |
| Trichomoniasis                                                      | 131.xx                               |
| Sexually transmitted infections                                     | 091.xx - 099.xx                      |
| Herpes simplex                                                      | 054.xx                               |
|                                                                     |                                      |
| <i>Respiratory (includes the following):</i>                        |                                      |
| Acute nasopharyngitis                                               | 460                                  |
| Acute sinusitis                                                     | 461.x                                |
| Acute pharyngitis                                                   | 462                                  |
| Acute laryngitis and tracheitis                                     | 464.xx                               |
| Acute upper respiratory infections of multiple or unspecified sites | 465.x                                |
| Chronic sinusitis                                                   | 473.x                                |
| Postnasal drip                                                      | 784.91                               |
| Viral pneumonia                                                     | 480.x                                |
| Pneumococcal pneumonia                                              | 481                                  |
| Other bacterial pneumonia                                           | 482.xx                               |
| Pneumonia due to other specified organism                           | 483.x                                |
| Pneumonia in infectious diseases classified elsewhere               | 484.x                                |
| Bronchopneumonia, organism unspecified                              | 485                                  |
| Pneumonia, organism unspecified                                     | 486                                  |
| Streptococcal sore throat                                           | 034.0                                |
| Whooping cough                                                      | 033.xx                               |
| Abscess of lung                                                     | 513.0                                |
| Tuberculosis, pulmonary                                             | 011, 012                             |

|                                                           |                       |
|-----------------------------------------------------------|-----------------------|
| Rheumatic pneumonia                                       | 517.1                 |
| Pulmonary coccidioidomycosis, unspecified                 | 114.5                 |
| Primary coccidioidomycosis (pulmonary)                    | 114.0                 |
| Infection by Histoplasma, pneumonia                       | 115.x5                |
| Pneumonitis due to toxoplasmosis                          | 130.4                 |
| Pneumocystosis                                            | 136.3                 |
| Candidiasis of lung                                       | 112.4                 |
| Ornithosis with pneumonia                                 | 073.0                 |
| Postmeasles pneumonia                                     | 055.1                 |
| Varicella (hemorrhagic) pneumonitis                       | 052.1                 |
| Pulmonary actinomycotic infection                         | 039.1                 |
| Pulmonary tularemia                                       | 021.2                 |
| Pulmonary anthrax                                         | 022.1                 |
| Diphtheria                                                | 032.0 - 032.3, 032.84 |
|                                                           |                       |
| <i>Genitourinary (includes the following):</i>            |                       |
| Infections of kidney                                      | 590.xx                |
| Cystitis                                                  | 595.xx                |
| Urethritis not sexually transmitted and urethral syndrome | 597.xx                |
| Urethral stricture due to infection                       | 598.0x                |
| Urinary tract infection                                   | 599.0                 |
|                                                           |                       |
| <i>Gastrointestinal (includes the following):</i>         |                       |
| Gastrointestinal infections                               | 001.xx - 009.xx       |
|                                                           |                       |
| <i>Sepsis (includes the following):</i>                   |                       |
| Bacteremia                                                | 790.7                 |
| Sepsis                                                    | 995.91                |
| Severe sepsis                                             | 995.92                |
| Septic shock                                              | 785.52                |
| Septicemia                                                | 038.0, 038.1x-038.9x  |

|                                                                                                              |                                                                                                                 |
|--------------------------------------------------------------------------------------------------------------|-----------------------------------------------------------------------------------------------------------------|
| Sepsis in pregnancy                                                                                          | 670.2x, 670.3x                                                                                                  |
| Anthrax septicemia                                                                                           | 022.3                                                                                                           |
| Meningococemia                                                                                               | 036.2                                                                                                           |
| Herpetic septicemia                                                                                          | 054.5                                                                                                           |
| Septic arterial embolism                                                                                     | 449                                                                                                             |
|                                                                                                              |                                                                                                                 |
| <i>Other (includes the following):</i>                                                                       |                                                                                                                 |
| Cellulitis                                                                                                   | 681.xx, 682.xx, 686.xx                                                                                          |
| Lyme disease                                                                                                 | 088.81                                                                                                          |
| Plague                                                                                                       | 020.2, 020.3, 020.4, 020.5                                                                                      |
| Diseases due to other mycobacteria                                                                           | 031.0                                                                                                           |
| Q fever                                                                                                      | 083.0                                                                                                           |
| Primary extrapulmonary coccidioidomycosis                                                                    | 114.1                                                                                                           |
|                                                                                                              |                                                                                                                 |
| <b>ACUTE CEREBROVASCULAR DISEASE CODES<br/>(not pregnancy-specific)<sup>1</sup></b>                          |                                                                                                                 |
| Ischemic stroke                                                                                              | 433.01, 433.10, 433.11, 433.21, 433.31, 433.81, 433.91,<br>434.00, 434.01, 434.11, 434.91, and 436 <sup>1</sup> |
| Transient ischemic attack                                                                                    | 435 <sup>1</sup>                                                                                                |
| Intracerebral hemorrhage                                                                                     | 431 <sup>1</sup>                                                                                                |
| Subarachnoid hemorrhage                                                                                      | 430 <sup>1</sup>                                                                                                |
| Epidural/subdural intracranial hemorrhage                                                                    | 432 <sup>3</sup>                                                                                                |
| Pituitary apoplexy                                                                                           | 253.2 <sup>3</sup>                                                                                              |
| Carotid/vertebral artery dissection                                                                          | 443.21, 443.24 <sup>3</sup>                                                                                     |
| Cerebral venous thrombosis                                                                                   | 325 <sup>18</sup>                                                                                               |
| Other acute cerebrovascular disorders                                                                        | 437.x <sup>19</sup>                                                                                             |
| Iatrogenic stroke                                                                                            | 997.02 <sup>1</sup>                                                                                             |
| Trauma (excluded from analysis)                                                                              | 800-804, 850-854 <sup>3</sup>                                                                                   |
| Acute rehabilitation admission (excluded from analysis)                                                      | V57.x                                                                                                           |
|                                                                                                              |                                                                                                                 |
| <b>PREGNANCY-SPECIFIC STROKE CODES</b>                                                                       |                                                                                                                 |
| Peripartum phlebitis and thrombosis, cerebral venous thrombosis, and thrombosis of intracranial venous sinus | 671.5 <sup>3,4</sup>                                                                                            |
| Cerebrovascular disorders in the puerperium, unspecified                                                     | 674 <sup>1</sup>                                                                                                |



|                                                                                                                                                                                                                                                                                                                                                                                                                              |                     |
|------------------------------------------------------------------------------------------------------------------------------------------------------------------------------------------------------------------------------------------------------------------------------------------------------------------------------------------------------------------------------------------------------------------------------|---------------------|
| Cerebrovascular disorders in the puerperium, delivered, with or without mention of antepartum condition                                                                                                                                                                                                                                                                                                                      | 674.01 <sup>1</sup> |
| Cerebrovascular disorders in the puerperium, delivered, with mention of postpartum complication                                                                                                                                                                                                                                                                                                                              | 674.02 <sup>1</sup> |
| Cerebrovascular disorders in the puerperium, antepartum condition or complication                                                                                                                                                                                                                                                                                                                                            | 674.03 <sup>1</sup> |
| Cerebrovascular disorders in the puerperium, postpartum condition or complication                                                                                                                                                                                                                                                                                                                                            | 674.04 <sup>1</sup> |
| References for codes are noted in table and included in Reference list at end of Supplementary Appendix. ICD-9: International Classification of Diseases, 9 <sup>th</sup> edition. APR: All patient refined. DRG: diagnosis related group. PPV: positive predictive value. DVT: deep vein thrombosis. PE: pulmonary embolism. HIV: human immunodeficiency virus. SPARCS: Statewide Planning and Research Cooperative System. |                     |

**Supplemental Table III. Discharge disposition in women with preeclampsia, with and without pregnancy-associated stroke (control group matched on age, race/ethnicity, and severity of preeclampsia).**

| <b>Disposition</b>             | <b>Cases (PEC and PAS)<br/>n = 197 (%)</b> | <b>Controls (PEC and no PAS)<br/>n = 591 (%)</b> |
|--------------------------------|--------------------------------------------|--------------------------------------------------|
| Home                           | 89 (45.2)                                  | 540 (91.4)                                       |
| Home with home services        | 30 (15.2)                                  | 39 (6.6)                                         |
| Left against medical advice    | 1 (0.5)                                    | 7 (1.2)                                          |
| Acute inpatient rehabilitation | 23 (11.7)                                  | 1 (0.2)                                          |
| Other acute care hospital      | 22 (11.2)                                  | 2 (0.3)                                          |
| Skilled nursing facility       | 6 (3.0)                                    | 1 (0.2)                                          |
| Death (in hospital)*           | 26 (13.2)                                  | 1 (0.2)                                          |

\*There was no significant difference in mortality between stroke cases with mild and severe PEC; 7 of 57 (12.3%) of mild cases died, and 19 of 140 (13.6%) severe cases died (p=0.81). The majority of women who died had hemorrhagic strokes (21 of 26, 80.1%). More deaths were due to hemorrhagic stroke in the severe group than in the mild group (89.5% vs 57.1%, p=0.06), although the difference did not reach statistical significance.

**Supplemental Table IV. Subgroup analysis, mild and severe cases/controls, univariable analysis**

| Prevalence of risk factors                           | Mild Group  |                        |         | Severe group |                        |          | Matched on Severity |                            |         |
|------------------------------------------------------|-------------|------------------------|---------|--------------|------------------------|----------|---------------------|----------------------------|---------|
|                                                      | Cases (PAS) | Controls (without PAS) | p-value | Cases (PAS)  | Controls (without PAS) | p-value  | Cases (PEC and PAS) | Controls (PEC without PAS) | p-value |
|                                                      | n=57 (%)    | n=171 (%)              |         | n=140 (%)    | n=420 (%)              |          | N = 197 (%)         | N (591)                    |         |
| Pre-existing hypertension                            | 25 (44)     | 35 (20)                | p=0.001 | 19 (14)      | 9 (2)                  | p<0.0001 | 44 (22)             | 44 (7)                     | <.0001  |
| Prothrombotic states                                 | 1 (2)       | 9 (5)                  | p=0.5   | 25 (18)      | 13 (3)                 | p<0.0001 | 26 (13)             | 22 (4)                     | <.0001  |
| <i>Hypercoagulable state</i>                         | 1 (2)       | 6 (4)                  | p=0.7   | 14 (10)      | 10 (2)                 | p<0.0001 | 15 (8)              | 16(3)                      | 0.002   |
| <i>Sickle cell</i>                                   | 0 (0)       | 1 (1)                  | p=1.0   | 5 (4)        | 0 (0)                  | p<0.0001 | 5 (3)               | 1 (0)                      | 0.005   |
| <i>Lupus</i>                                         | 0 (0)       | 2 (1)                  | p=1.0   | 2 (1)        | 0 (0)                  | p=0.1    | 2 (1)               | 2 (0)                      | 0.3     |
| <i>DVT/PE (acute, chronic, or history of prior)</i>  | 0 (0)       | 0 (0)                  |         | 10 (7)       | 3 (1)                  | p<0.0001 | 10 (5)              | 3 (1)                      | <.0001  |
| Any infection present on admission                   | 12 (21)     | 9 (5)                  | p=0.001 | 16 (11)      | 25 (6)                 | p=0.04   | 28 (14)             | 34 (6)                     | p<0.001 |
| <i>Genitourinary infection</i>                       | 10 (18)     | 4 (2)                  | p=0.002 | 10 (7)       | 6 (1)                  | p=0.001  | 20 (10)             | 10 (2)                     | p<0.001 |
| <i>Chorioamnionitis</i>                              | 0 (0)       | 4 (2)                  | p=0.6   | 4 (3)        | 8 (2)                  | p=0.5    | 4 (2)               | 12 (2)                     | p=1.0   |
| <i>Non-specified pregnancy related infection</i>     | 3 (5)       | 4 (2)                  | p=0.4   | 3 (2)        | 16 (4)                 | p=0.4    | 6 (3)               | 20 (3)                     | p=1.0   |
| <i>Respiratory infection</i>                         | 0 (0)       | 0 (0)                  |         | 0 (0)        | 2 (0)                  | p=1.0    | 0 (0)               | 2 (0)                      | p=1.0   |
| <i>Gastrointestinal infection</i>                    | 0 (0)       | 0 (0)                  |         | 1 (1)        | 1 (0)                  | p=0.4    | 1 (1)               | 1 (0)                      | p=0.4   |
| <i>Sexually transmitted infection (includes HIV)</i> | 1 (2)       | 0 (0)                  | p=0.3   | 0 (0)        | 6 (1)                  | p=0.3    | 1 (1)               | 6 (1)                      | p=0.7   |
| <i>Sepsis</i>                                        | 1 (2)       | 1 (1)                  | p=0.4   | 2 (1)        | 0 (0)                  | p=0.1    | 3 (2)               | 1 (0)                      | p=0.1   |
| <i>Other infection</i>                               | 3 (5)       | 0 (0)                  | p=0.02  | 1 (1)        | 11 (3)                 | p=0.3    | 4 (2)               | 11 (2)                     | p=1.0   |
| Coagulopathy                                         | 5 (9)       | 7 (4)                  | p=0.2   | 24 (17)      | 26 (6)                 | p<0.0001 | 29 (15)             | 33 (6)                     | <.0001  |
| Migraine                                             | 3 (5)       | 0 (0)                  | p=0.02  | 3 (2)        | 5 (1)                  | p=0.4    | 6 (3)               | 5 (1)                      | 0.03    |
| Any heart disease                                    | 1 (2)       | 0 (0)                  | p=0.3   | 5 (4)        | 4 (1)                  | p=0.05   | 6 (3)               | 4 (1)                      | 0.02    |
| <i>Congestive heart failure</i>                      | 0 (0)       | 0 (0)                  |         | 1 (1)        | 0 (0)                  | p=0.3    | 1 (1)               | 0 (0)                      | 0.3     |
| <i>Chronic ischemic heart disease</i>                | 0 (0)       | 0 (0)                  |         | 1 (1)        | 0 (0)                  | p=0.3    | 1 (1)               | 0 (0)                      | 0.3     |
| <i>Congenital heart disease</i>                      | 0 (0)       | 0 (0)                  |         | 1 (1)        | 1 (0)                  | p=0.3    | 1 (1)               | 0 (0)                      | 0.3     |
| <i>Valvular heart disease</i>                        | 1 (2)       | 0 (0)                  | p=0.3   | 2 (1)        | 4 (1)                  | p=0.6    | 3 (2)               | 4                          | 0.4     |
| Chronic renal disease                                | 0 (0)       | 3 (2)                  | p=0.6   | 1 (1)        | 2 (0)                  | p=1.0    | 1 (1)               | 5                          | 1.0     |
| Proteinuria/nephrotic syndrome                       | 0 (0)       | 0 (0)                  |         | 1 (1)        | 0 (0)                  | p=0.3    | 1 (1)               | 0 (0)                      | 0.3     |
| Drug abuse or dependence                             | 1 (2)       | 3 (2)                  | p=1.0   | 3 (2)        | 7 (2)                  | p=0.7    | 4 (2)               | 10 (2)                     | 0.8     |
| Alcohol abuse                                        | 1 (2)       | 4 (2)                  | p=1.0   | 3 (2)        | 9 (2)                  | p=1.0    | 4 (2)               | 13 (2)                     | 1.0     |
| HIV/AIDS (SPARCS Indicator)                          | 0 (0)       | 0 (0)                  |         | 0 (0)        | 3 (1)                  | p=0.6    | 0 (0)               | 3 (1)                      | 0.6     |
| Diabetes                                             | 4 (7)       | 6 (4)                  | p=0.3   | 3 (2)        | 8 (2)                  | p=1.0    | 7 (4)               | 14 (2)                     | 0.4     |
| Active smoking                                       | 2 (4)       | 6 (4)                  | p=1.0   | 2 (1)        | 7 (2)                  | p=1.0    | 4 (2)               | 13 (2)                     | 1.0     |
| Obesity                                              | 6 (11)      | 2 (1)                  | p=0.004 | 2 (1)        | 13 (3)                 | p=0.4    | 8 (4)               | 15 (3)                     | 0.3     |
| Pulmonary hypertension                               | 0 (0)       | 0 (0)                  |         | 0 (0)        | 2 (0)                  | p=1.0    | 0 (0)               | 2 (0)                      | 1       |
| Gestational diabetes                                 | 0 (0)       | 0 (0)                  |         | 0 (0)        | 0 (0)                  |          | 0 (0)               | 0 (0)                      |         |
| Gestational hypertension                             | 2 (4)       | 4 (2)                  | p=0.6   | 5 (4)        | 16 (4)                 | p=0.9    | 7 (4)               | 20 (3)                     | 1.0     |
| Multiple gestation                                   | 1 (2)       | 10 (6)                 | p=0.3   | 3 (2)        | 31 (7)                 | p=0.02   | 4 (2)               | 41 (7)                     | 0.008   |
| Multigravida                                         | 0 (0)       | 0 (0)                  |         | 17 (12)      | 134 (32)               | p<0.0001 | 35 (18)             | 182                        | 0.0004  |

**Supplemental Table V: Demographics and risk factors: Comparing mild vs severe controls, mild vs severe cases**

|                                                             | <b>Mild PEC, controls (n=171)</b> | <b>Severe PEC, controls (n=420)</b> | <b>p-value</b> | <b>Mild PEC, cases (n=57)</b> | <b>Severe PEC, cases (n=140)</b> | <b>p-value</b> |
|-------------------------------------------------------------|-----------------------------------|-------------------------------------|----------------|-------------------------------|----------------------------------|----------------|
| Age <sup>a</sup>                                            |                                   |                                     | p = 0.4        |                               |                                  | p= 0.7         |
| <i>24 and under</i>                                         | 30 (17.5%)                        | 96 (22.9%)                          |                | 10 (17.5%)                    | 32 (22.9%)                       |                |
| <i>25-34</i>                                                | 84 (49.1%)                        | 195 (46.4%)                         |                | 28 (49.1%)                    | 65 (46.4%)                       |                |
| <i>35-44</i>                                                | 57 (33.3%)                        | 129 (30.7%)                         |                | 19 (33.3%)                    | 43 (30.7%)                       |                |
| Race/Ethnicity <sup>a</sup>                                 |                                   |                                     | p = 0.8        |                               |                                  | p= 1.0         |
| <i>Non-Hispanic White</i>                                   | 42 (24.6%)                        | 108 (25.7%)                         |                | 14 (24.6%)                    | 36 (25.7%)                       |                |
| <i>Non-Hispanic Black</i>                                   | 63 (36.8%)                        | 150 (35.7%)                         |                | 21 (36.8%)                    | 50 (35.7%)                       |                |
| <i>Non-Hispanic Other</i>                                   | 33 (19.3%)                        | 66 (15.7%)                          |                | 11 (19.3%)                    | 22 (15.7%)                       |                |
| <i>Hispanic</i>                                             | 30 (17.5%)                        | 87 (20.7%)                          |                | 10 (17.5%)                    | 29 (20.7%)                       |                |
| <i>Unknown</i>                                              | 3 (1.8%)                          | 9 (2.1%)                            |                | 1 (1.8%)                      | 3 (2.1%)                         |                |
| Insurance status <sup>a</sup>                               |                                   |                                     | p = 0.5        |                               |                                  | p= 0.6         |
| <i>Uninsured</i>                                            | 3 (1.8%)                          | 3 (0.7%)                            |                | 0 (0.0%)                      | 4 (2.9%)                         |                |
| <i>Medicare</i>                                             | 1 (0.6%)                          | 6 (1.4%)                            |                | 14 (24.6%)                    | 29 (20.7%)                       |                |
| <i>Medicaid</i>                                             | 35 (20.5%)                        | 95 (22.6%)                          |                | 43 (75.4%)                    | 105 (75.0%)                      |                |
| <i>Private</i>                                              | 132 (77.2%)                       | 316 (75.2%)                         |                | 0 (0.0%)                      | 2 (1.4%)                         |                |
| Multigravida                                                | 48 (28.1%)                        | 134 (31.9%)                         | p = 0.4        | 18 (31.6%)                    | 17 (12.1%)                       | p=0.001        |
| Multiple gestation                                          | 10 (5.8%)                         | 31 (7.4%)                           | p = 0.5        | 1 (1.8%)                      | 3 (2.1%)                         | p=1.0          |
| Cesarean section                                            | 92 (53.8%)                        | 306 (72.9%)                         | p < 0.0001     | 34 (59.6%)                    | 85 (60.7%)                       | p= 0.9         |
| Any infection present on admission (includes the following) | 9 (5%)                            | 26 (6%)                             | p=0.8          | 12 (21%)                      | 16 (11%)                         | p=0.1          |
| <i>Genitourinary infection</i>                              | 4 (2)                             | 6 (1%)                              | p=0.3          | 10 (6%)                       | 10 (7%)                          | p=0.2          |
| <i>Chorioamnionitis</i>                                     | 4 (2)                             | 8 (2)                               | p=0.8          | 0 (0%)                        | 4 (3%)                           | p=0.3          |
| <i>Non-specified pregnancy related infection</i>            | 4 (2%)                            | 16 (5%)                             | p=0.5          | 3 (5%)                        | 3 (2%)                           | p=0.4          |
| <i>Respiratory infection</i>                                | 0 (0%)                            | 2 (0%)                              | p=1.0          | 0 (0%)                        | 0 (0%)                           |                |
| <i>Gastrointestinal infection</i>                           | 0 (0%)                            | 1 (0%)                              | p=1.0          | 0 (0%)                        | 1 (1%)                           | p=1.0          |

|                                                                        |            |           |                   |            |            |                  |
|------------------------------------------------------------------------|------------|-----------|-------------------|------------|------------|------------------|
| <i>Sexually transmitted infection (includes HIV)</i>                   | 0 (0%)     | 6 (1%)    | <i>p</i> =0.2     | 1 (2%)     | 0 (0%)     | <i>p</i> =0.3    |
| <i>Sepsis</i>                                                          | 1 (1%)     | 0 (0%)    | <i>p</i> =0.3     | 1 (2%)     | 2 (1%)     | <i>p</i> =1.0    |
| <i>Other infection</i>                                                 | 0 (0%)     | 11 (3%)   | <i>p</i> =0.04    | 3 (5%)     | 1 (1%)     | <i>p</i> =0.1    |
| Diabetes                                                               | 6 (3.5%)   | 8 (1.9%)  | <i>p</i> = 0.2    | 4 (7.0%)   | 3 (2.1%)   | <i>p</i> =0.1    |
| Pre-existing hypertension                                              | 35 (20.5%) | 9 (2.1%)  | <i>p</i> < 0.0001 | 25 (43.9%) | 19 (13.6%) | <i>P</i> <0.0001 |
| Any heart disease <sup>b</sup>                                         | 0 (0%)     | 4 (1.0%)  | <i>p</i> = 0.3    | 1 (1.8%)   | 5 (3.6%)   | <i>p</i> =0.7    |
| Migraine                                                               | 0 (0%)     | 5 (1.2%)  | <i>p</i> = 0.3    | 3 (5.3%)   | 3 (2.1%)   | <i>p</i> =0.4    |
| Obesity                                                                | 2 (1.2%)   | 13 (3.1%) | <i>p</i> = 0.3    | 6 (10.5%)  | 2 (1.4%)   | <i>p</i> =0.01   |
| Chronic renal disease                                                  | 3 (1.8%)   | 2 (0.5%)  | <i>p</i> = 0.1    | 0 (0.0%)   | 1 (0.7%)   | <i>p</i> =1.0    |
| Prothrombotic state <sup>c</sup>                                       | 9 (5.3%)   | 13 (3.1%) | <i>p</i> = 0.2    | 1 (1.8%)   | 25 (17.9%) | <i>p</i> =0.002  |
| History of or presence of deep venous thrombosis or pulmonary embolism | 0 (0%)     | 3 (0.7%)  | <i>p</i> = 0.6    | 0 (0.0%)   | 10 (7.1%)  | <i>p</i> =0.1    |
| Lupus                                                                  | 2 (1.2%)   | 0 (0%)    | <i>p</i> = 0.1    | 0 (0.0%)   | 2 (1.4%)   | <i>p</i> =1.0    |
| Primary hypercoagulable state                                          | 6 (3.5%)   | 10 (2.4%) | <i>p</i> = 0.4    | 1 (1.8%)   | 14 (10.0%) | <i>p</i> =0.1    |
| Sickle cell disease                                                    | 1 (0.6%)   | 0 (0%)    | <i>p</i> = 0.3    | 0 (0.0%)   | 5 (3.6%)   | <i>p</i> =0.3    |
| Coagulopathy                                                           | 7 (4.1%)   | 26 (6.2%) | <i>p</i> = 0.4    | 5 (8.8%)   | 24 (17.1%) | <i>p</i> =0.2    |
| Pulmonary hypertension                                                 | 0 (0%)     | 2 (0.5%)  | <i>p</i> = 1.0    | 0 (0%)     | 0 (0%)     |                  |
| Active smoking                                                         | 6 (3.5%)   | 7 (1.7%)  | <i>p</i> = 0.2    | 2 (3.5%)   | 2 (1.4%)   | <i>p</i> =0.6    |
| Drug abuse or dependence                                               | 3 (1.8%)   | 7 (1.7%)  | <i>p</i> = 1.0    | 1(1.8%)    | 3 (2.1%)   | <i>p</i> =1.0    |
| Alcohol abuse                                                          | 4 (2.3%)   | 9 (2.1%)  | <i>p</i> = 1.0    | 1(1.8%)    | 3 (2.1%)   | <i>p</i> =1.0    |
| HIV/AIDS                                                               | 0 (0%)     | 3 (0.7%)  | <i>p</i> = 0.6    | 0 (0%)     | 0 (0%)     |                  |

<sup>a</sup> *p*-values refer to significance of distribution across categories.

<sup>b</sup> “Any heart disease” includes congenital or valvular heart disease, congestive heart failure, or chronic ischemic heart disease.

<sup>c</sup> “Prothrombotic state” includes history of or current deep venous thrombosis or pulmonary embolism, lupus, primary hypercoagulable states, or sickle cell disease.

**Supplemental Table VI. Stroke risk factors in cases and controls (matched on age, race/ethnicity, and severity), excluding cases and controls with eclampsia**

| <b>Risk factors: multivariable analysis (excluding eclampsia)</b> |            | <b>Odds ratio</b> | <b>95% CI</b>   |
|-------------------------------------------------------------------|------------|-------------------|-----------------|
| Chronic hypertension                                              | Unadjusted | 4.1               | 2.3-7.4         |
|                                                                   | Adjusted   | <b>4.2</b>        | <b>2.2-7.8</b>  |
| Infection present on admission                                    | Unadjusted | 4.2               | 2.2-8.1         |
|                                                                   | Adjusted   | <b>3.7</b>        | <b>1.8-7.7</b>  |
| Prothrombotic states                                              | Unadjusted | 3.4               | 1.8-6.4         |
|                                                                   | Adjusted   | <b>2.6</b>        | <b>1.1-6.3</b>  |
| Multiple gestation                                                | Unadjusted | 0.3               | 0.1-0.9         |
|                                                                   | Adjusted   | <b>0.2</b>        | <b>0.06-0.8</b> |
| Heart disease                                                     | Unadjusted | 3.6               | 1.0-13.4        |
|                                                                   | Adjusted   | 1.4               | 0.3-6.6         |
| Multigravida                                                      | Unadjusted | 0.7               | 0.4-1.1         |
|                                                                   | Adjusted   | 0.8               | 0.5-1.3         |
| Coagulopathy                                                      | Unadjusted | 3.2               | 1.7-6.0         |
|                                                                   | Adjusted   | 1.7               | 0.7-4.0         |

**Supplemental Table VII. Subgroup Analysis: Post-partum cases only**

| <b>Risk factors, postpartum cases and their controls: univariate analysis</b>                                                                                            | Cases (PEC and postpartum PAS) | Controls (PEC without PAS) | p-value            |
|--------------------------------------------------------------------------------------------------------------------------------------------------------------------------|--------------------------------|----------------------------|--------------------|
|                                                                                                                                                                          | n=131 (%)                      | n=393 (%)                  |                    |
| <b>Chronic hypertension</b>                                                                                                                                              | <b>30 (23)</b>                 | <b>27 (7)</b>              | <b>p&lt;0.0001</b> |
| <b>Prothrombotic states</b>                                                                                                                                              | <b>18 (14)</b>                 | <b>13 (3)</b>              | <b>p&lt;0.0001</b> |
| <i>Hypercoagulable state</i>                                                                                                                                             | 9 (7)                          | 10 (3)                     | p=0.03             |
| <i>Sickle cell</i>                                                                                                                                                       | 2 (2)                          | 0 (0)                      | p=0.1              |
| <i>Lupus</i>                                                                                                                                                             | 1 (1)                          | 1 (0)                      | p=0.4              |
| <i>DVT/PE (acute, chronic, or history of prior)</i>                                                                                                                      | 7 (5)                          | 2 (1)                      | p=0.001            |
| <b>Any infection present on admission</b>                                                                                                                                | <b>22 (18)</b>                 | <b>22 (6)</b>              | <b>p&lt;0.0001</b> |
| <i>Genitourinary infection</i>                                                                                                                                           | 18 (14)                        | 4 (1)                      | p<0.0001           |
| <i>Chorioamnionitis</i>                                                                                                                                                  | 3 (2)                          | 9 (2)                      | p=1.0              |
| <i>Non-specified pregnancy related infection</i>                                                                                                                         | 4 (3)                          | 15 (4)                     | p=0.8              |
| <i>Respiratory infection</i>                                                                                                                                             | 0 (0)                          | 2 (1)                      | p=1.0              |
| <i>Gastrointestinal infection</i>                                                                                                                                        | 0 (0)                          | 1 (0)                      | p=1.0              |
| <i>Sexually transmitted infection (includes HIV)</i>                                                                                                                     | 0 (0)                          | 4 (1)                      | p=0.6              |
| <i>Sepsis</i>                                                                                                                                                            | 2 (2)                          | 1 (0)                      | p=0.2              |
| <i>Other infection</i>                                                                                                                                                   | 2 (2)                          | 8 (2)                      | p=1.0              |
| <b>Coagulopathy</b>                                                                                                                                                      | <b>16 (12)</b>                 | <b>19 (5)</b>              | <b>p=0.003</b>     |
| <b>Migraine</b>                                                                                                                                                          | <b>4 (3)</b>                   | <b>2 (1)</b>               | <b>p=0.04</b>      |
| <b>Any heart disease</b>                                                                                                                                                 | <b>5 (4)</b>                   | <b>2 (1)</b>               | <b>p=0.01</b>      |
| <i>Congestive heart failure</i>                                                                                                                                          | 1 (1)                          | 0 (0)                      | p=0.25             |
| <i>Chronic ischemic heart disease</i>                                                                                                                                    | 0 (0)                          | 0 (0)                      |                    |
| <i>Congenital heart disease</i>                                                                                                                                          | 3 (2)                          | 2 (1)                      | p=0.2              |
| <i>Valvular heart disease</i>                                                                                                                                            | 1 (1)                          | 0 (0)                      | p=0.25             |
| <i>Chronic renal disease</i>                                                                                                                                             | 0 (0)                          | 3 (1)                      | p=0.6              |
| <i>Proteinuria/nephrotic syndrome</i>                                                                                                                                    | 1 (1)                          | 0 (0)                      | p=0.25             |
| <i>Drug abuse or dependence</i>                                                                                                                                          | 1 (1)                          | 6 (2)                      | p=0.7              |
| <i>Alcohol abuse</i>                                                                                                                                                     | 2 (2)                          | 6 (2)                      | p=1.0              |
| <i>HIV/AIDS (SPARCS Indicator)</i>                                                                                                                                       | 0 (0)                          | 2 (1)                      | p=1.0              |
| <i>Diabetes</i>                                                                                                                                                          | 4 (3)                          | 9 (2)                      | p=0.7              |
| <i>Active smoking</i>                                                                                                                                                    | 3 (2)                          | 9 (2)                      | p=1.0              |
| <i>Obesity</i>                                                                                                                                                           | 3 (2)                          | 11 (3)                     | p=1.0              |
| <i>Pulmonary hypertension</i>                                                                                                                                            | 0 (0)                          | 1 (0)                      | p=1.0              |
| <i>Gestational diabetes</i>                                                                                                                                              | 0 (0)                          | 0 (0)                      |                    |
| <i>Gestational hypertension</i>                                                                                                                                          | 4 (3)                          | 12 (3)                     | p=1.0              |
| <b>Multiple gestation</b>                                                                                                                                                | <b>1 (1)</b>                   | <b>24 (6)</b>              | <b>p=0.01</b>      |
| <b>Multigravida</b>                                                                                                                                                      | <b>18 (14)</b>                 | <b>122 (31)</b>            | <b>p=0.0001</b>    |
| <b>Cesarean section</b>                                                                                                                                                  | <b>68 (52)</b>                 | <b>254 (65)</b>            | <b>p=0.002</b>     |
| PEC: preeclampsia. PAS: pregnancy-associated stroke. DVT: deep vein thrombosis. PE: pulmonary embolism. Bolded characteristics were included in the multivariable model. |                                |                            |                    |

**Supplemental Table VIII. Stroke risk factors in post-partum cases and their controls (matched on age, race/ethnicity, and severity)**

| <b>Risk factors: multivariable analysis</b> |                 | <b>Odds ratio</b> | <b>95% CI</b>   |
|---------------------------------------------|-----------------|-------------------|-----------------|
| Chronic hypertension                        | Unadjusted      | 5.6               | 2.8-11.0        |
|                                             | <b>Adjusted</b> | <b>5.0</b>        | <b>2.3-10.5</b> |
| Infection present on admission              | Unadjusted      | 3.6               | 1.9-6.9         |
|                                             | <b>Adjusted</b> | <b>3.6</b>        | <b>1.8-7.3</b>  |
| Prothrombotic states                        | Unadjusted      | 4.4               | 2.1-9.1         |
|                                             | <b>Adjusted</b> | <b>3.6</b>        | <b>1.4-9.7</b>  |
| Coagulopathy                                | Unadjusted      | 2.8               | 1.4-5.6         |
|                                             | Adjusted        | 1.3               | 0.5-3.5         |
| Heart disease                               | Unadjusted      | 7.5               | 1.5-38.7        |
|                                             | Adjusted        | 3.7               | 0.4-33.4        |
| Multiple gestation                          | Unadjusted      | 0.1               | 0.02-0.9        |
|                                             | Adjusted        | 0.1               | 0.01-1.0        |
| Multigravida                                | Unadjusted      | 0.4               | 0.2-0.6         |
|                                             | <b>Adjusted</b> | <b>0.4</b>        | <b>0.2-0.7</b>  |
| Cesarean section                            | Unadjusted      | 0.6               | 0.4-0.9         |
|                                             | Adjusted        | 0.7               | 0.4-1.1         |



## Supplemental Figure I: Stroke subtypes in women with preeclampsia and stroke

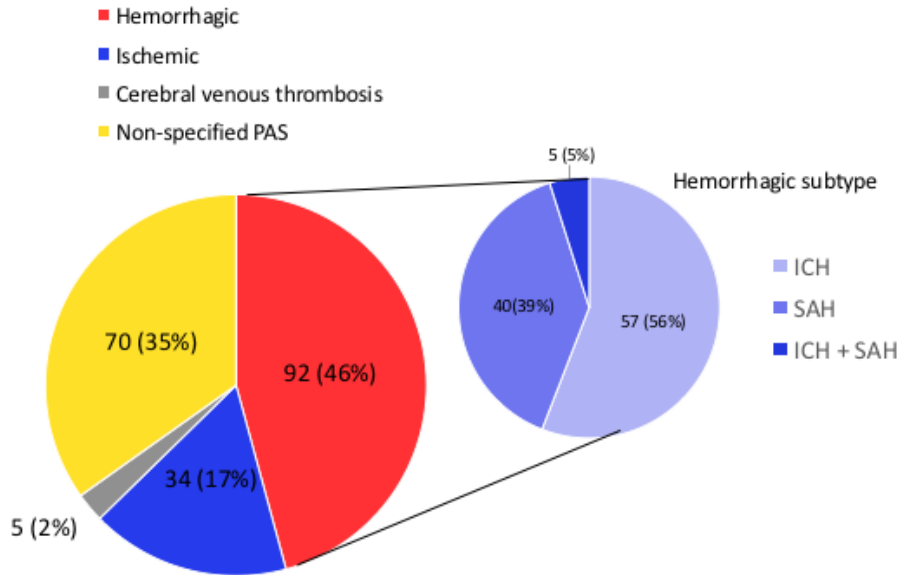

There were 197 women identified during the study period with preeclampsia and stroke of any type. The large circle indicates stroke types (ischemic, hemorrhagic, cerebral venous thrombosis or non-specified), with raw numbers and percentage of total cases. The smaller circle indicates the subtypes of hemorrhagic stroke in shades of blue, with raw numbers and percentages within the group of women with hemorrhagic strokes. Of the 92 women with hemorrhagic strokes, 11 (12.0%) had underlying coagulopathies and 12 (13.0%) had underlying prothrombotic states. Among women with ischemic strokes, 6 of 34 (17.6%) had coagulopathies, and another 6 of 34 (17.6%) had prothrombotic states; in non-specified PAS, 12 of 70 (17.1%) had coagulopathies, and 8 of 70 (11.4%) had prothrombotic states. PAS: pregnancy-associated stroke. ICH: intracerebral hemorrhage. SAH: subarachnoid hemorrhage.

## ONLINE DATA SUPPLEMENT: REFERENCES

1. Leffert LR, Clancy CR, Bateman BT, Bryant AS, Kuklina EV. Hypertensive disorders and pregnancy-related stroke: frequency, trends, risk factors, and outcomes. *Obstetrics & Gynecology*. 2015;125:124–131.
2. Leffert LR, Clancy CR, Bateman BT, Cox M, Schulte PJ, Smith EE et al. Patient Characteristics and Outcomes After Hemorrhagic Stroke in Pregnancy. *Circ Cardiovasc Qual Outcomes*. 2015;8:S170–8.
3. Kamel H, Navi BB, Sriram N, Hovsepian DA, Devereux RB, Elkind MSV. Risk of a Thrombotic Event after the 6-Week Postpartum Period. *N. Engl. J. Med.* 2014;370:1307–1315.
4. Kuklina EV, Tong X, Bansil P, George MG, Callaghan WM. Trends in Pregnancy Hospitalizations That Included a Stroke in the United States From 1994 to 2007: Reasons for Concern? *Stroke*. 2011;42:2564–2570.
5. Sigakis MJG, Leffert LR, Mirzakhani H, Sharawi N, Rajala B, Callaghan WM et al. The Validity of Discharge Billing Codes Reflecting Severe Maternal Morbidity. *Anesthesia & Analgesia* [Internet]. 2016;123:731–738.
6. Miller EC, Gatollari HJ, Too G, Boehme AK, Leffert L, Elkind MSV, Willey JZ. Risk of Pregnancy-Associated Stroke Across Age Groups in New York State. *JAMA Neurol.* 2016;73:1461–1467.
7. Bushnell CD, Jamison M, James AH. Migraines during pregnancy linked to stroke and vascular diseases: US population based case-control study. *BMJ* [Internet]. 2009;338:b664.
8. Kuklina EV, Callaghan WM. Cardiomyopathy and other myocardial disorders among hospitalizations for pregnancy in the United States: 2004-2006. *Obstetrics & Gynecology* [Internet]. 2010;115:93–100.
9. National Center for Health Statistics. ICD-9-CM official guidelines for coding and reporting. Washington (DC): US GPO; 2011.
10. Phiri K, Hernandez-Diaz S, Tsen LC, Puopolo KM, Seeger JD, Bateman BT. Accuracy of ICD-9-CM coding to identify small for gestational age newborns. *Pharmacoepidemiol Drug Saf.* 2015;24:381–388.
11. Mhyre JM, Tsen LC, Einav S, Kuklina EV, Leffert LR, Bateman BT. Cardiac arrest during hospitalization for delivery in the United States, 1998-2011. *Anesthesiology*. 2014;120:810–818.
12. Bateman BT, Mhyre JM, Hernandez-Diaz S, Huybrechts KF, Fischer MA, Creanga AA, Callaghan WM, Gagne JJ. Development of a comorbidity index for use in obstetric patients. *Obstetrics & Gynecology*. 2013;122:957–965.
13. Palmsten K, Huybrechts KF, Kowal MK, Mogun H, Hernandez-Diaz S. Validity of maternal and infant outcomes within nationwide Medicaid data. *Pharmacoepidemiol Drug Saf* [Internet]. 2014;23:646–655.
14. Geller SE, Ahmed S, Brown ML, Cox SM, Rosenberg D, Kilpatrick SJ. International Classification of Diseases-9th revision coding for preeclampsia: how accurate is it? *The American Journal of Obstetrics & Gynecology*. 2004;190:1629–33– discussion 1633–4.
15. American College of Obstetricians and Gynecologists, Task Force on Hypertension in Pregnancy. Hypertension in pregnancy. Report of the American College of Obstetricians and Gynecologists' Task Force on Hypertension in Pregnancy. 2013. p. 1122–1131.

16. Elixhauser A, Steiner C, Kuzik D. Comorbidity software documentation: HCUP Methods Series Report 2004-01. US Agency for Healthcare Research and Quality; 2004.
17. Mhyre JM, Bateman BT, Leffert LR. Influence of patient comorbidities on the risk of near-miss maternal morbidity or mortality. *Anesthesiology*. 2011;115:963–972.
18. Wasay M, Bakshi R, Bobustuc G, Kojan S, Sheikh Z, Dai A, Cheema Z. Cerebral venous thrombosis: analysis of a multicenter cohort from the United States. *J Stroke Cerebrovasc Dis*. 2008;17:49–54.
19. Lanska DJ, Kryscio RJ. Risk factors for peripartum and postpartum stroke and intracranial venous thrombosis. *Stroke*. 2000;31:1274–1282.
